# Supplementary material for: Axl deficiency promotes preeclampsia and vascular malformations in mice
Source: PubMed Central journal article supplement — Mol Ther Nucleic Acids. 2024 Nov 28;36(1):102408. doi: 10.1016/j.omtn.2024.102408 (PMC11699228; doi:10.1016/j.omtn.2024.102408), 2024-11-28
Supplement: mmc1.pdf [file mmc1.pdf]

OMTN, Volume 36

## **Supplemental information**

### **Axl deficiency promotes preeclampsia and vascular malformations in mice**

**Chan Zhou, Yunqing Zhu, Liang Zhang, Miaomiao Zhao, and Cong Zhang**

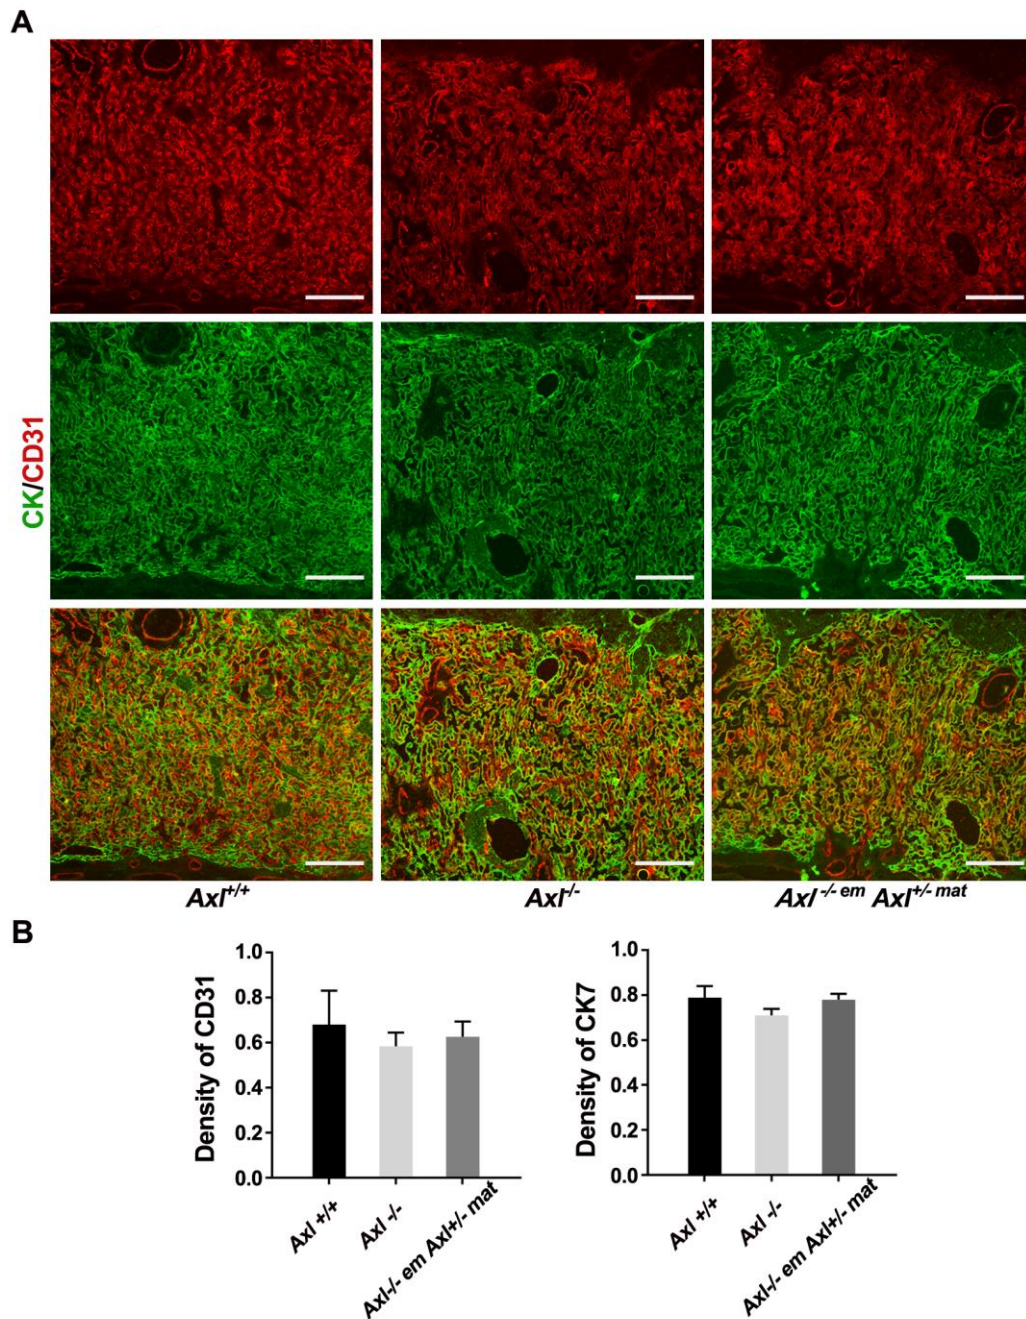

**Fig.S1. AXL deletion impaired junction area but not labyrinth.**

(A) Photomicrographs of trophoblast cell marker (cytokeratin, CK) and blood vessel endothelial marker (CD31) at E14.5 maternal-fetal interfaces of different groups. (B) Quantification of vascular and trophoblastic density using CD31 and CK, respectively. Scale bars, 0.2 mm.

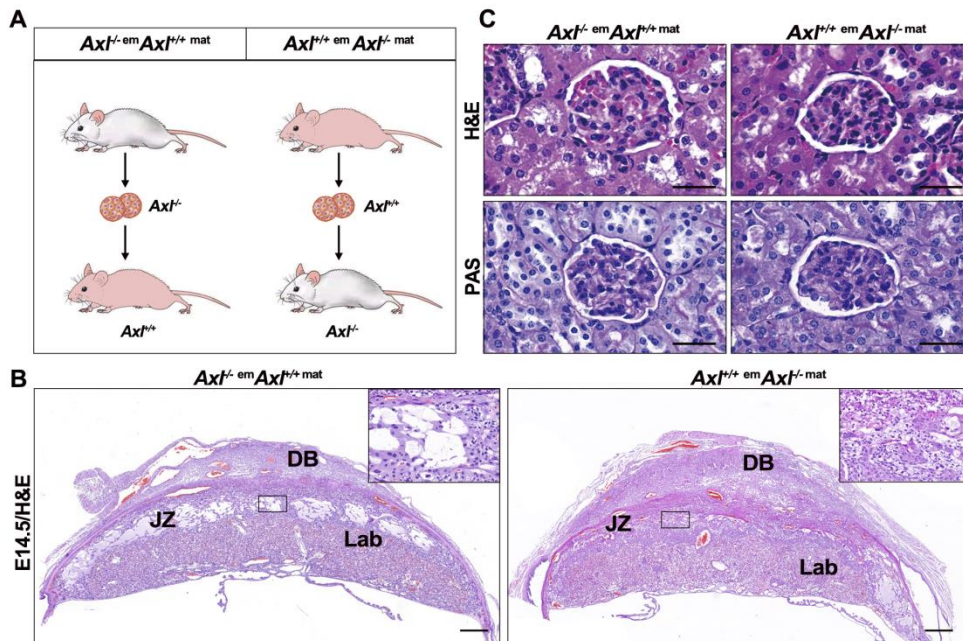

**Fig.S2. Embryo transferring between *Axl*<sup>+/+</sup> and *Axl*<sup>-/-</sup> mice.**

(A) Sketch map of embryo transfer. (B) The placenta from *Axl*<sup>-/-</sup> mice carrying *Axl*<sup>+/+</sup> fetus showed large confluent areas of glycogen deposition, replacing much of the JZ at E18.5. DB, decidual basalis; JZ, junctional zone; Lab, labyrinth. Scale bars, 0.5 mm. (C) Comparison of H&E and PAS staining of the renal tissues in embryo transferred mice. Results indicate increased extracellular matrixes in *Axl*<sup>-/-</sup> females with *Axl*<sup>+/+</sup> embryo. Scale bars, 50  $\mu$ m.

**Table S1. The clinical characteristics of study subjects in the sPE and**

**Normal Pregnancy groups.**

sPE, severe pre-eclampsia; SBP, systolic blood pressure; DBP, diastolic blood pressure; NA, not applicable. All data are presented as means  $\pm$  SD.

| Variables                           | sPE (n=16)            | NC (n=17)                | P value |
|-------------------------------------|-----------------------|--------------------------|---------|
| Age(years)                          | 32.19 $\pm$ 2.903     | 29.65 $\pm$ 3.334        | 0.5969  |
| Gestational age at delivery (weeks) | 37.19 $\pm$ 2.563     | 38.82 $\pm$ 3.588        | <0.01   |
| SBP (mmHg)                          | 150.5 $\pm$ 11.237    | 119 $\pm$ 9.062          | <0.01   |
| DBP (mmHg)                          | 94.06 $\pm$ 6.527     | 75.94 $\pm$ 8.863        | <0.01   |
| Birth weight (g)                    | 3043.75 $\pm$ 457.038 | 3547.06 $\pm$<br>487.811 | <0.05   |
| Proteinuria (+)                     | ++~+++                | NA                       | NA      |

**Table S2. Antibodies used for immunostaining and Western blot analysis.**

| <b>Antibody</b>                        | <b>Dilution</b> | <b>Source</b>             | <b>Identifier</b> |
|----------------------------------------|-----------------|---------------------------|-------------------|
| Rabbit polyclonal anti-CYTOKERATIN     | 1/300           | DAKO                      | Z0622             |
| Rat polyclonal anti-CD31               | 1/300           | Biolegend                 | 102501            |
| Rabbit polyclonal anti- $\alpha$ -SMA  | 1/200           | Proteintech               | 55135-1-AP        |
| Rabbit polyclonal anti-AXL             | 1/1000          | Affinity                  | AF7793            |
| Rabbit polyclonal anti-p-STAT3(Ser727) | 1/1000          | Cell signaling technology | 49081             |
| Rabbit polyclonal anti- STAT3          | 1/1000          | Cell signaling technology | 4904              |
| Rabbit polyclonal anti-CORIN           | 1/500           | ABclonal technology       | A10404            |
| Mouse monoclonal anti-VIMENTIN         | 1/300           | ABclonal technology       | AB8978            |
| Rabbit polyclonal anti-GAPDH           | 1/1000          | Cell signaling technology | 5174              |

**Table S3. qPCR primers.**

| <b>Target</b>  | <b>Forward Primer</b>  | <b>Reverse Primer</b>     | <b>Product size</b> |
|----------------|------------------------|---------------------------|---------------------|
| <i>Gapdh</i>   | GGAGCGAGATCCCTCCAAAAT  | GGCTGTTGTCATACTTCTCATGG   | 197bp               |
| <i>Corin</i>   | CTACAACCATACACATTATCCA | TTGTCCTGTATTACATCAC       | 172bp               |
| <i>Angptl1</i> | AAGACATGGACAATGATAACTG | CAAGTGCTGATGAACTGAAT      | 122bp               |
| <i>Ren2</i>    | ACACTGGTTCATCCTTTATC   | ACAGCTCACAACATATTCAT      | 104bp               |
| <i>Ada</i>     | AAGGTGGACCCAATGCCC     | CCGGACCTTGATGCCAAATGCTTGC | 117bp               |
| -275~-79       | TCTAGTGGAGATGGGCTACAGT | GTGTAGACATTCCAAAGCAAAGGT  | 196bp               |
| -421~-272      | ACACTGCTTTCCTTGACGCT   | AAACGGCGTTGCTGTTTGAG      | 149bp               |
| -497~-397      | TGAAGCTCAAACAGCAACGC   | TGTCAGGTTTCGAAGGCAGG      | 100bp               |
| -646~-478      | CCTGCCTTCGAAACCTGACA   | AGCAGTGTAAGGGCTGCTC       | 168bp               |
| -782~-622      | GAAGAGAGCAGCCCTTTACA   | TTTCTATGGCAGATGGAGAGCC    | 160bp               |
| -866~-689      | TGCTGCCCCATAGTTGAAGG   | CCTTCACTCACGTCTCTGGG      | 177bp               |
| -971~-848      | CCAGAGACGTGAGTGAAGGG   | GGCACTACGGGTGTCTTTCT      | 123bp               |
